# Supplementary material for: Unusual mammalian usage of TGA stop codons reveals that sequence conservation need not imply purifying selection
Source: PLoS Biol. 2022 May 12;20(5):e3001588. doi: 10.1371/journal.pbio.3001588 (PMC9129041; doi:10.1371/journal.pbio.3001588)
Supplement: S4 Data — (XLSX) [file pbio.3001588.s014.xlsx]

## Sheet: Sheet1
Switch	Primates
	Bottom 50% by recombination rate			Top 50% by recombination rate
	Freq	Flux events	Ancestral nodes	Freq	Flux events	Ancestral nodes
TAA > TGA	0.274667	61	838	0.384865	64	674
TAA > TAG	0.189115	42	838	0.132297	22	674
TGA > TAA	0.185434	66	1343	0.164999	62	1523
TGA > TAG	0.0533824	19	1343	0.0532253	20	1523
TAG > TAA	0.229248	37	609	0.180712	28	628
TAG > TGA	0.0681547	11	609	0.0839019	13	628
S4 Data. Underling data for Figure 4.
Freq refers to the number of observed flux events divided by the number of appropriate reconstructed ancestral nodes.
